**Drug Disposition: Drug Disposition & Malignant Hypothermia**

- A-518** Room H, 10/16/2000 9:00 AM - 11:00 AM (PS)  
**Prospective Validation of the Context Sensitive Half Times for Propofol** Matthew T. Chan, FANZCA; P.T. Chui, FANZCA; Y.H. Tam, M Phil; Tony Gin, MD, Anaesthesia and Intensive Care, Chinese University of Hong Kong, Hong Kong. The calculated context sensitive half times for propofol closely predicts the actual decline of plasma concentration.
- A-519** Room H, 10/16/2000 9:00 AM - 11:00 AM (PS)  
**A Pilot Study of Oral Transmucosal Etomidate in Volunteers** Talmage D. Egan, M.D.; Carl Roland, Pharm.D.; Julia L. White, RN,BS; Mason A. Gay, BS; Steven E. Kern, Ph.D., Department of Anesthesiology, University of Utah, Salt Lake City, UT, United States. We studied the relative bioavailability of OTS-Etomidate in a group of 12 volunteers as a proof of concept study for providing sedation with the OTS product.
- A-520** Room H, 10/16/2000 9:00 AM - 11:00 AM (PS)  
**In-Vivo Effects of the Serotonin-2 Receptor Agonist DOI on Anesthetized Swine Susceptible for Malignant Hyperthermia** Marko Fiege, MD; Frank Wappler, MD; Jens Scholz, MD; Ralf Weissborn, MD; Jochen Schulte am Esch, MD, Department of Anesthesiology, University Hospital Eppendorf, Hamburg, Germany. MH-typical reactions to DOI in malignant hyperthermia susceptible swine are stress-independent.
- A-521** Room H, 10/16/2000 9:00 AM - 11:00 AM (PS)  
**Pharmacokinetics of TCI-Propofol in Parkinson's Disease Patients Undergoing Sub-Thalamic Deep Brain Stimulation Implantation** Pedro L. Gambus, MD; Inaki F. Troconiz, PhD; Ricard Valero, MD; Enrique Carrero, MD; Neus Fabregas, MD, Anesthesiology, Hospital Clinic, Univ. Barcelona, Barcelona, Spain. Propofol-TCI kinetic model is less accurate and is biased for sedation of Parkinson patients.
- A-522** Room H, 10/16/2000 9:00 AM - 11:00 AM (PS)  
**Preoperative  $\beta$ -Blockade Has a Protective Effect on Epinephrine-Induced Myocardial Ischemia in Patients Undergoing Coronary Surgery** Michael Gunnicker, MD; Michael T. Nosch, MD; Goran Pavlakovic, MD; Matthias Brinkmann, MD, Dept. of Anesthesiology and Intensive-Care, University Hospital, Essen, Germany.  $\beta$ -Blockade avoids myocardial lactate generation after epinephrine.
- A-523** Room H, 10/16/2000 9:00 AM - 11:00 AM (PS)  
**Lack of Involvement of CYP2B and 2C in the Metabolism of Midazolam: Kinetic Analysis and Inhibition Study with Monoclonal Antibodies** Naoya Hamaoka; Yutaka Oda; Ichiro Hase; Tatsuo Nakamoto; Akira Asada, Anesthesiology and Intensive Care Medicine, Osaka City University, Osaka, Japan. Cytochrome P450 2B and 2C are not involved in the metabolism of midazolam
- A-524** Room H, 10/16/2000 9:00 AM - 11:00 AM (PS)  
**Noninvasive Estimation of the Recirculatory Pharmacokinetics of a Marker of the Intravascular Space during Liver Transplantation** Thomas K. Hentborn, MD; Susan Mandell, MD, PhD, Anesthesiology and Pharmaceutical Sciences, University of Colorado Health Sciences Center, Denver, CO, United States. The peripheral circuit with the long mean transit time consists largely of the splanchnic circulation.
- A-525** Room H, 10/16/2000 9:00 AM - 11:00 AM (PS)  
**Evidence That the Fentanyl Blood-Brain-Barrier Transporter Is pKa-Specific** Thomas K. Hentborn, MD; Xiangdong Yan, PhD; Lawrence Ng, PhD, Anesthesiology and Pharmaceutical Sciences, University of Colorado Health Sciences Center, Denver, CO, United States. The active transport of fentanyl into brain endothelial cells is more potently inhibited by basic drugs than by acidic drugs.
- A-526** Room H, 10/16/2000 9:00 AM - 11:00 AM (PS)  
**The Effects of Propofol on Platelet Aggregation** Hideo Hirakata, MD; Masami Sugahara, MD; Kazuhiko Fukuda, MD, Anesthesia, Kyoto University Hospital, Kyoto, Japan. Propofol and Diprivan® have different effects on platelet aggregation and IP<sub>3</sub> formation, although Intralipid® did not affect platelet IP<sub>3</sub> formation.
- A-527** Room H, 10/16/2000 9:00 AM - 11:00 AM (PS)  
**Influence of Sufentanil Concentration on Propofol Requirement and Recovery Times during Thyroid Surgery** Malik Housni, MD; Elisabeth Hentgen, MD; Florent Capron, MD; Jean-Marc Ropars; Valerie Billard, MD, Anesthésie, Institut Gustave Roussy, Villejuif, France
- A-528** Room H, 10/16/2000 9:00 AM - 11:00 AM (PS)  
**Pharmacokinetics of Liposomal  $\Delta^9$ -Tetrahydrocannabinol (THC) Delivered through the Lungs** Orlando R. Hung, MD; Pang Shek, PhD; Peter Tikuisis, PhD; Jiri Zamecnik, PhD, Anesthesia, Dalhousie University, Halifax, Nova Scotia, Canada
- A-529** Room H, 10/16/2000 9:00 AM - 11:00 AM (PS)  
**Effects of Parecoxib, a Parenteral COX-2 Specific Inhibitor, on the Disposition of Midazolam** Andra Ibrahim, MD; Aziz Karim, PhD; Jennifer Feldman, BS; Evan Kharasch, MD, PhD, Anesthesiology, University of Washington, Seattle, WA, United States
- A-530** Room H, 10/16/2000 9:00 AM - 11:00 AM (PS)  
**Effects of Parecoxib, a Parenteral COX-2 Specific Inhibitor, on the Disposition of Propofol** Andra Ibrahim, MD; Sang Park, PhD; Jennifer Feldman, BS; Evan Kharasch, MD, PhD, Anesthesiology, University of Washington, Seattle, WA, United States
- A-531** Room H, 10/16/2000 9:00 AM - 11:00 AM (PS)  
**The Elimination of Alfentanil Is Decreased by Propofol** Harald Ihmsen, M.Sc.; Sven Albrecht, M.D.; Jorg Fechner, M.D.; Werner Hering, M.D.; Jurgen Schuttler, M.D., Department of Anesthesiology, University of Erlangen-Nuremberg, Erlangen, Germany. Pharmacokinetics of alfentanil during TIVA with propofol was studied in 20 patients. Clearance of alfentanil was reduced by 38%.
- A-532** Room H, 10/16/2000 9:00 AM - 11:00 AM (PS)  
**PK/PD Analysis of Etomidate Given across the Buccal Mucosa** Steven E. Kern, Ph.D.; Carl Roland, Pharm.D.; Julia L. White, RN,BS; Mason A. Gay, BS; Talmage D. Egan, M.D., Department of Anesthesiology, University of Utah, Salt Lake City, UT, United States. We studied the kinetics and dynamics of a transmucosal etomidate in volunteers using multiple arterial blood samples, the OAA/S score and the BIS index.
- A-533** Room H, 10/16/2000 9:00 AM - 11:00 AM (PS)  
**Intrarenal Metabolism and Toxicity of Methoxyflurane** Evan D. Kharasch, MD, PhD; Richard A. Zager, MD; Candy Hsieh, BS; Eric Flameo, BS, Anesthesiology, University of Washington, Seattle, WA, United States
